# Supplementary material for: Pharmacological Inhibition of the DNA Damage Checkpoint Prevents Radiation-Induced Oocyte Death
Source: Oxford University Press journal article supplement (doi:10.1534/genetics.117.203455), 2017-06-02
Supplement: figures1.pdf [file figures1.pdf]

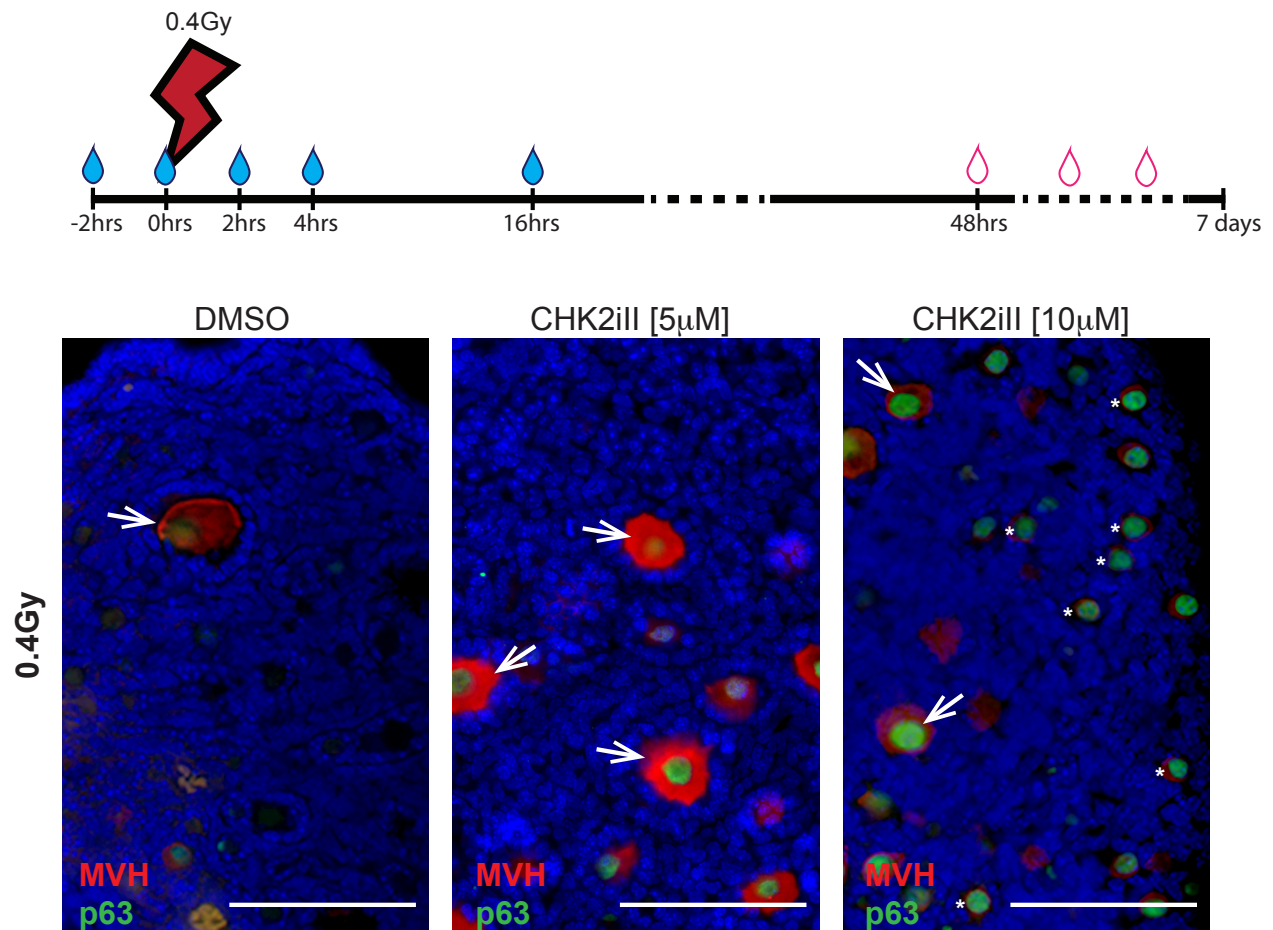

**Supplemental figure 1.** Representative immunofluorescence images of ovaries cultured according to the timeline in the presence of the indicated concentrations of CHK2iII. MVH is a cytoplasmic germ cell marker MVH, and p63 is a nuclear oocyte marker. Sections were counterstained with the chromatin-binding dye Hoechst. Asterisks indicate primordial follicles, and arrows growing follicles. The latter are generally refractory to IR. The treatment followed the same regimen as Fig 2a.
