# Supplementary material for: Pharmacological Inhibition of the DNA Damage Checkpoint Prevents Radiation-Induced Oocyte Death
Source: Oxford University Press journal article supplement (doi:10.1534/genetics.117.203455), 2017-06-02
Supplement: figures2.pdf [file figures2.pdf]

**a**

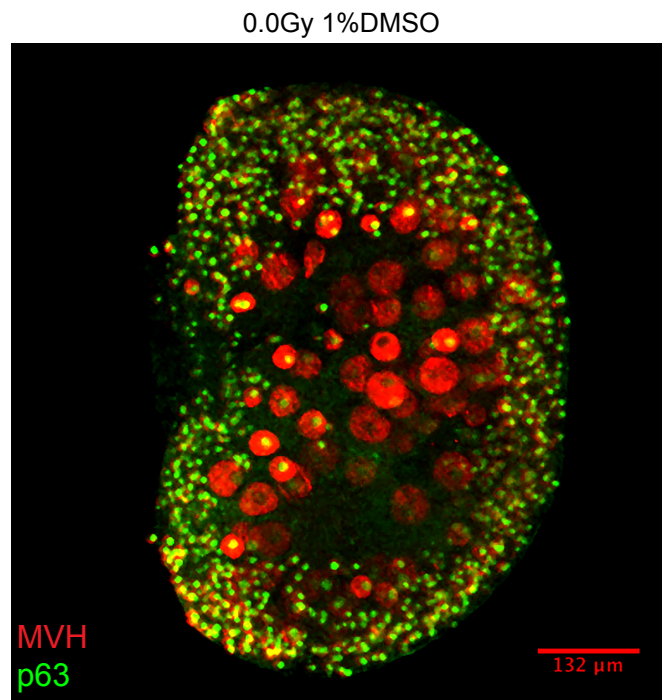

**b**

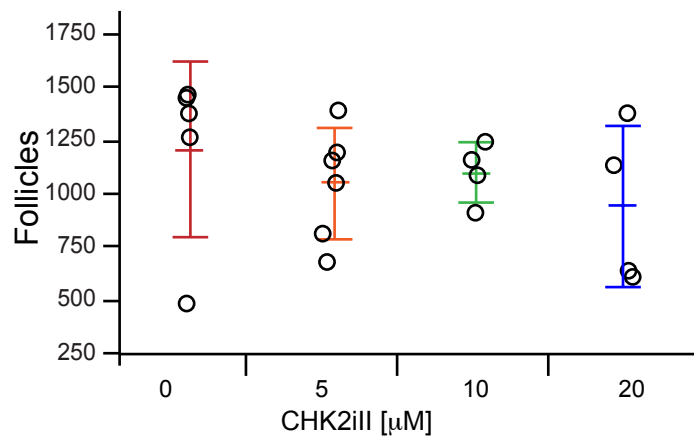

**Supplemental figure 2:** The inhibitor CHK2iII does not compromise follicle survival in non-irradiated control. **(a)** Whole mount maximum intensity projection of an ovary stained with MVH and p63. **(b)** Follicle counts of CHK2iII treated ovaries. There are no statistically significant differences between the inhibitor concentrations tested.
