# Supplementary material for: Pharmacological Inhibition of the DNA Damage Checkpoint Prevents Radiation-Induced Oocyte Death
Source: Oxford University Press journal article supplement (doi:10.1534/genetics.117.203455), 2017-06-02
Supplement: figures3.pdf [file figures3.pdf]

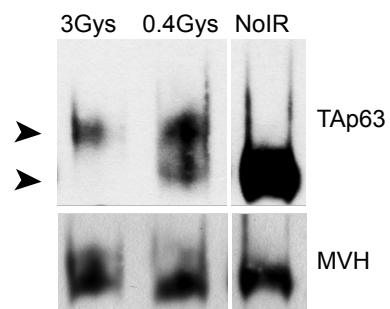

**Supplemental figure 3:** Western blot analysis of ovaries showing that 0.4Gys activates the DNA damage checkpoint.
