# Supplementary material for: Pharmacological Inhibition of the DNA Damage Checkpoint Prevents Radiation-Induced Oocyte Death
Source: Oxford University Press journal article supplement (doi:10.1534/genetics.117.203455), 2017-06-02
Supplement: figures4.pdf [file figures4.pdf]

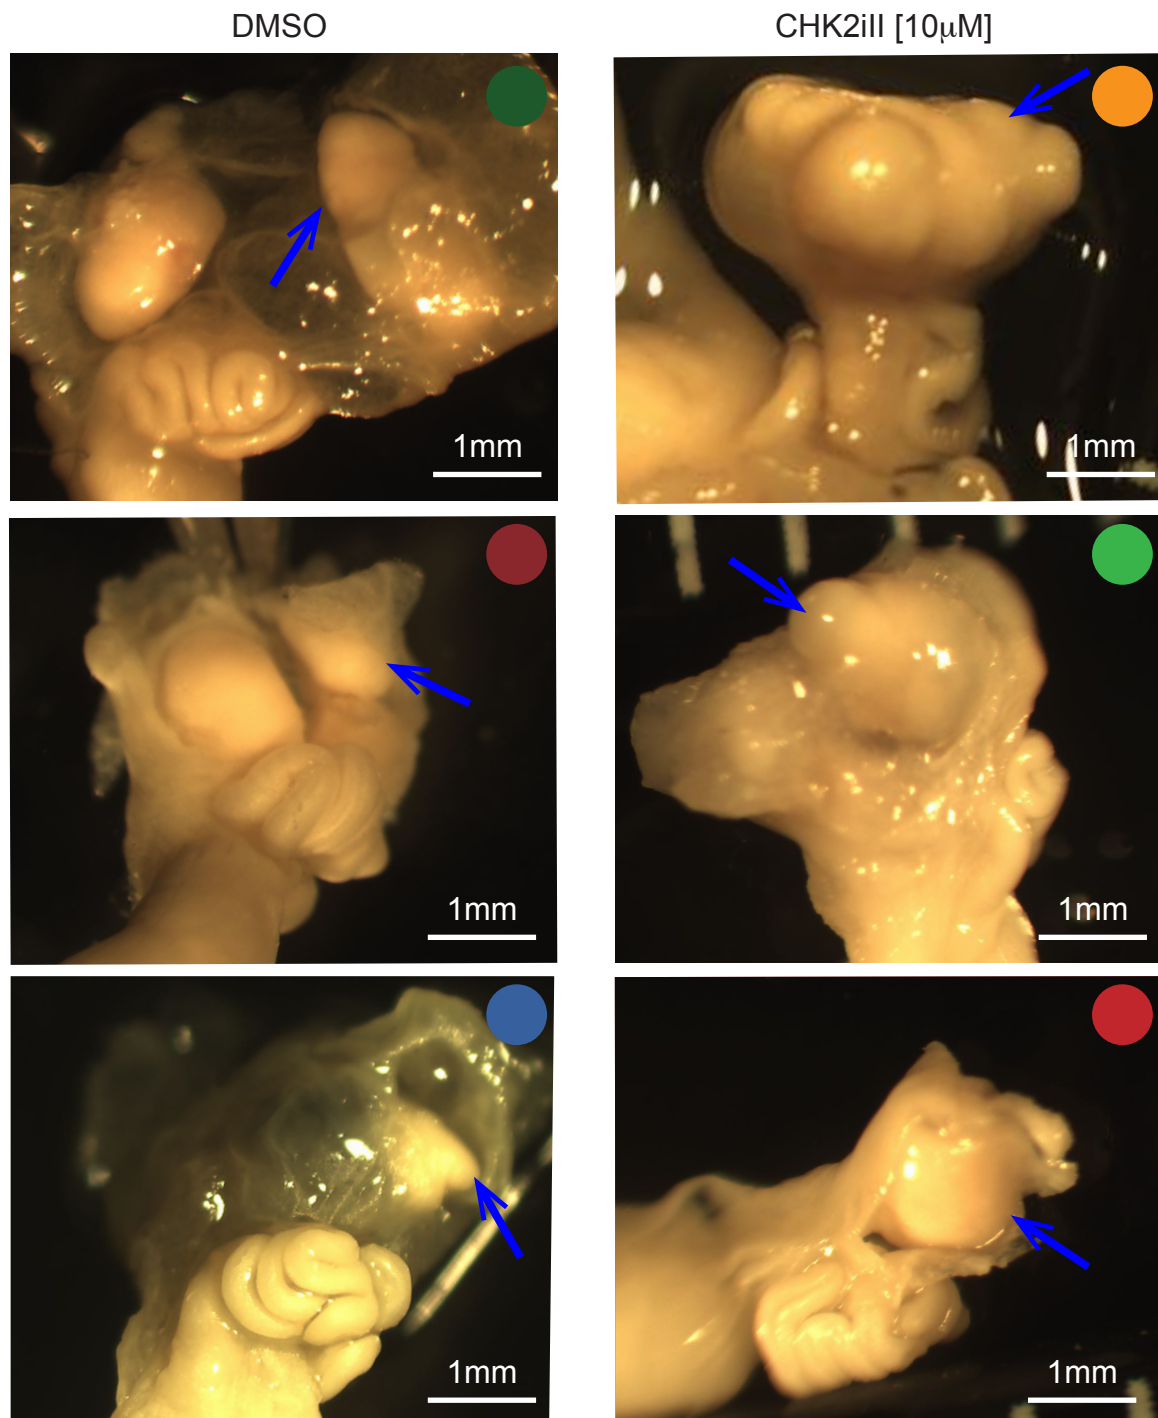

**Supplemental Fig. 4.** Images of ovaries from females that underwent ovary transfer surgery. Blue arrow points to ovarian tissue, presumably from the donors. Colored circles correspond to females represented in Fig. 3C. DMSO ovaries were not treated with CHK2iII. Only 1 side from each mouse is shown.
